# Supplementary material for: Butyrate and Dietary Soluble Fiber Improve Neuroinflammation Associated With Aging in Mice
Source: PubMed Central journal article supplement (PMC6102557; doi:10.3389/fimmu.2018.01832), 2018-08-14

**A**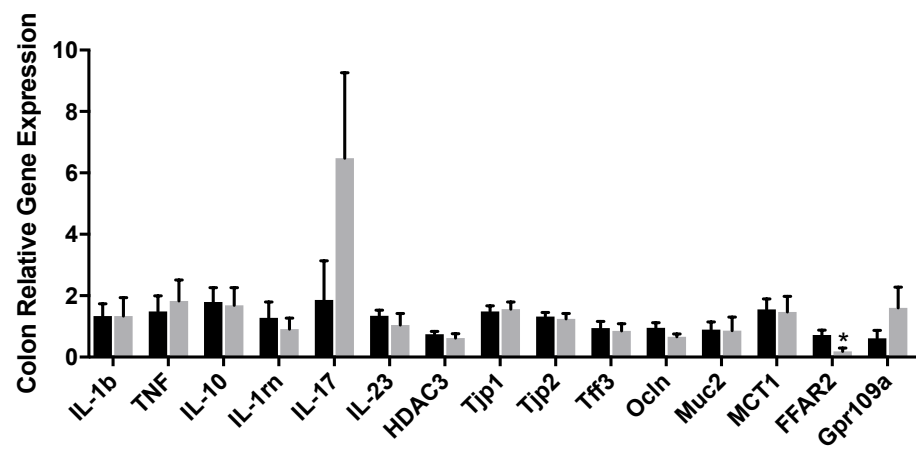**B**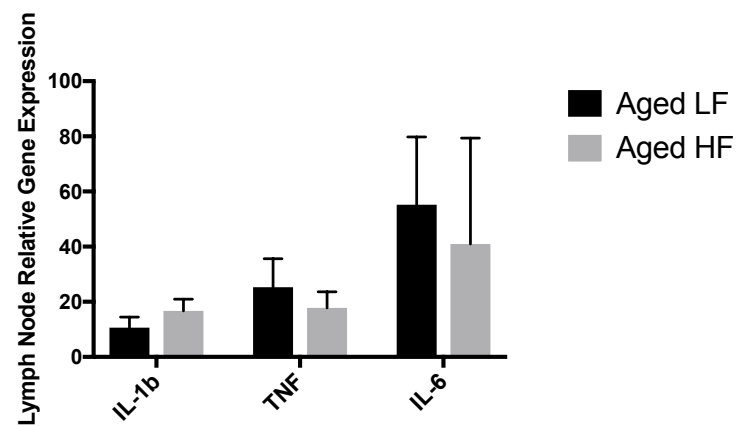

Supplement: Image_4.pdf [file Image_4.pdf]
